# Supplementary material for: Long-term efficacy of Mindfulness Based Stress Reduction on Depression and Anxiety, Symptoms and Distress, Health Status, Coping Capacity and Immune Response in Breast Cancer Survivors: A longitudinal Randomized Controlled Trial
Source: Research Square preprint supplement (doi:10.21203/rs.3.rs-7518570/v1), 2025-10-30
Supplement: Supplementary file 1 [file 38d385611c568dac8371fb7e.docx]

**Table 7** Changes within group

| **Measures** | **Group** | **6 months** | **1 year** | **5 years** |
| --- | --- | --- | --- | --- |
| **Anxiety** | MBSR |  |  |  |
| Active controls |  |  |  |
| Non-MBSR |  | **0.026** |  |
| **Depression** | MBSR | **0.012** | **0.001** |  |
| Active controls |  |  |  |
| Non-MBSR |  |  |  |
| **Physical Symptoms** | MBSR | **0.014** | **0.032** |  |
| Active controls |  | **0.045** |  |
| Non-MBSR |  |  |  |
| **Psychological Symptoms** | MBSR |  | **0.002** |  |
| Active controls |  |  |  |
| Non-MBSR |  |  |  |
| **Global Distress** | MBSR | **0.034** | **0.031** |  |
| Active controls |  |  |  |
| Non-MBSR |  | **0.028** |  |
| **Total Symptom Burden** | MBSR |  |  |  |
| Active controls |  |  |  |
| Non-MBSR |  |  |  |
| **Vitality** | MBSR | **<0.001** | **<0.001** |  |
| Active controls | **0.017** | **0.011** |  |
| Non-MBSR |  |  |  |
| **Physical functioning** | MBSR | **<0.001** | **<0.001** |  |
| Active controls |  |  |  |
| Non-MBSR | **0.015** | **0.021** |  |
| **General health perceptions** | MBSR | **0.029** |  |  |
| Active controls | **0.048** |  |  |
| Non-MBSR |  |  |  |
| **Physical role functioning** | MBSR | **0.002** | **<0.001** |  |
| Active controls | **<0.001** | **<0.001** | **0.005** |
| Non-MBSR | **<0.001** | **<0.001** | **<0.001** |
| **Emotional role functioning** | MBSR | **0.004** | **0.048** |  |
| Active controls | **0.038** | **0.076** |  |
| Non-MBSR | **0.003** |  | **0.026** |
| **Social functioning** | MBSR | **<0.001** | **0.007** |  |
| Active controls | **0.032** | **0.008** |  |
| Non-MBSR | **0.031** |  | **0.005** |
| **Mental health** | MBSR | **<0.001** | **<0.001** | **0.038** |
| Active controls |  |  |  |
| Non-MBSR |  |  |  |
| **Coping Capacity** | MBSR |  |  |  |
| Active controls |  |  |  |
| Non-MBSR |  | **0.031** |  |
| **NK-cells activity** | MBSR |  |  | **0.003** |
| Active controls |  |  | **0.001** |
| Non-MBSR |  |  | **0.003** |
| **Lymphocytes x10e9/l** | MBSR |  | **0.008** | **0.004** |
| Active controls | **0.003** | **0.008** | **<0.001** |
| Non-MBSR |  | **<0.001** | **0.012** |
| **CD3 T%** | MBSR | **<0.001** | **<0.001** | **0.017** |
| Active controls | **0.009** | **0.005** |  |
| Non-MBSR | **<0.001** | **<0.001** | **<0.001** |
| **CD3 Tx10e9/l** | MBSR |  |  |  |
| Active controls | **0.039** |  | **0.001** |
| Non-MBSR |  | **0.020** | **0.037** |
| **CD3+4+Th%** | MBSR |  | **0.008** |  |
| Active controls |  |  |  |
| Non-MBSR | **<0.001** | **<0.001** | **0.046** |
| **CD3+4+x10e9/l** | MBSR |  |  | **0.001** |
| Active controls | **0.009** | **0.021** | **<0.001** |
| Non-MBSR |  | **0.007** | **0.012** |
| **CD3+8+T cy/s%** | MBSR | **<0.001** | **0.002** | **0.006** |
| Active controls | **0.013** | **<0.001** |  |
| Non-MBSR | **0.044** | **0.003** |  |
| **CD3+8+x10e9/l** | MBSR |  |  |  |
| Active controls |  |  | **0.005** |
| Non-MBSR |  | **0.024** |  |
| **CD3-16+56+NKx10e9/l** | MBSR |  |  |  |
| Active controls | **0.013** |  | **<0.001** |
| Non-MBSR | **0.014** | **<0.001** | **0.011** |
| **CD19 B%** | MBSR | **<0.001** | **<0.001** | **0.002** |
| Active controls | **0.003** | **<0.001** |  |
| Non-MBSR | **<0.001** | **<0.001** | **<0.001** |
| **CD19 Bx10e9/l** | MBSR | **<0.001** | **<0.001** | **<0.001** |
| Active controls | **<0.001** | **<0.001** | **<0.001** |
| Non-MBSR | **<0.001** | **<0.001** | **<0.001** |
| **CD3+4+/CD3+8+quotient%** | MBSR |  |  |  |
| Active controls |  | **0.023** |  |
| Non-MBSR |  |  |  |

**Table 8** Changes between groups and effect size

| **Measures** | **3 months** | **6 months** | **1 year** | **5 year** |
| --- | --- | --- | --- | --- |
| Depression | **0.015; (dCohen=0.5)** |  | **0.013; (dCohen=0.5)** |  |
| Anxiety |  |  | **0.023; (dCohen=0.4)** |  |
| Psychological  symptoms | **0.019; (dCohen=0.4)** |  | **0.005; (dCohen=0.6)** |  |
| Global distress | **0.013; (dCohen=0.5)** |  | **0.002; (dCohen=0.6)** |  |
| Total symptom burden |  |  | **0.046; (dCohen=0.4)** |  |
| Vitality |  |  | **0.007; (dCohen=0.5)** |  |
| General health perceptions |  |  | **0.031; (dCohen=0.4)** |  |
| Mental Health | **<0.001;( dCohen=0.7)** | **0.008; (dCohen=0.5)** | **<0.001; (dCohen=0.8)** |  |
| Coping capacity | **0.028; (dCohen=0.4)** | **0.044; (dCohen=0.4)** | **0.006; (dCohen=0.6)** |  |
| CD3-16+56+NKx10e9/l | **0.041; (dCohen=0.4)** |  |  |  |
| IL-6 |  | **0.049(dCohen=0.4)** |  |  |
| IL-8 |  |  | **0.039 (dCohen=0.4)** |  |
