# Supplementary material for: Long-term efficacy of Mindfulness Based Stress Reduction on Depression and Anxiety, Symptoms and Distress, Health Status, Coping Capacity and Immune Response in Breast Cancer Survivors: A longitudinal Randomized Controlled Trial
Source: Research Square preprint supplement (doi:10.21203/rs.3.rs-7518570/v1), 2025-10-30
Supplement: Supplementary file 2 [file 6bf0d7be7e34d3d16ab4444d.docx]

**Table 1** Baseline demographic data and clinical characteristics

|  | **Group** | | | | | |  |  |
| --- | --- | --- | --- | --- | --- | --- | --- | --- |
| **Measures** | **MBSR**  **(n=62)** | | **Active controls**  **(n=52)** | | **Non-MBSR**  **(n=52)** | | **Total**  **(n=166)** | |
|  | **N** | **%** | **N** | **%** | **N** | **%** | **N** | **%** |
| **Marital status** |  |  |  |  |  |  |  |  |
| Married/cohabitation | 46 | 74.2 | 35 | 67.3 | 42 | 80.8 | 123 | 74.1 |
| Widowed | 3 | 4.8 | 3 | 5.8 | 4 | 7.7 | 10 | 6.0 |
| Divorced | 6 | 9.7 | 8 | 15.4 | 1 | 1.9 | 15 | 9.0 |
| Single | 5 | 8.1 | 4 | 7.7 | 4 | 7.7 | 13 | 7.8 |
| Partner without l.t. | 2 | 3.2 | 2 | 3.8 | 1 | 1.9 | 5 | 3.0 |
| **Education** |  |  |  |  |  |  |  |  |
| Primary school | 5 | 8.1 | 1 | 1.9 | 1 | 1.9 | 7 | 4.2 |
| Secondary school | 14 | 22.6 | 10 | 19.2 | 11 | 21.2 | 35 | 21.1 |
| Add education–lower | 6 | 9.7 | 6 | 11.5 | 10 | 19.2 | 22 | 13.3 |
| Add education– higher | 7 | 11.3 | 11 | 21.2 | 5 | 9.6 | 23 | 13.9 |
| University | 30 | 48.4 | 24 | 46.2 | 25 | 48.1 | 79 | 47.6 |
| **Surgery** |  |  |  |  |  |  |  |  |
| Mastectomy | 30 | 48.4 | 26 | 50.0 | 21 | 40.4 | 77 | 46.4 |
| Lumpectomy | 33 | 53.2 | 26 | 50.0 | 30 | 57.7 | 89 | 53.6 |
| Other | 0 | 0 | 0 | 0 | 1 | 1.9 | 1 | 0.6 |
| **Tumor size** |  |  |  |  |  |  |  |  |
| <2 cm | 28 | 45.9 | 25 | 49.0 | 32 | 64.0 | 85 | 52.5 |
| 2-5 cm | 25 | 41.0 | 22 | 43.1 | 8 | 16.0 | 55 | 34.0 |
| >5 cm | 8 | 13.1 | 4 | 7.8 | 10 | 20.0 | 22 | 13.6 |
| **Type of cancer** |  |  |  |  |  |  |  |  |
| Ductal | 43 | 69.4 | 37 | 71.2 | 40 | 76.9 | 120 | 72.3 |
| Lobular | 13 | 21.0 | 9 | 17.3 | 6 | 11.5 | 28 | 16.9 |
| Other | 6 | 9.7 | 6 | 11.5 | 6 | 11.5 | 18 | 10.8 |
| **Receptor** |  |  |  |  |  |  |  |  |
| ER+/PgR+ | 40 | 69.0 | 34 | 72.3 | 39 | 78.0 | 113 | 72.9 |
| ER+/PgR- | 8 | 13.8 | 6 | 12.8 | 4 | 8.0 | 17 | 11.6 |
| ER-/PgR+ | 0 | 0.0 | 0 | 0.0 | 1 | 2.0 | 1 | 0.6 |
| ER-/PgR- | 10 | 17.2 | 7 | 14.9 | 6 | 12.0 | 24 | 14.8 |
| **BRE** (mean) | 6.6 |  | 6.5 |  | 6.6 |  |  |  |
| **Treatment postop** |  |  |  |  |  |  |  |  |
| Chemotherapy (CT) | 2 | 3.2 | 3 | 5.8 | 3 | 5.8 |  |  |
| Radiotherapy (RT) | 3 | 4.8 | 5 | 9.6 | 4 | 7.7 |  |  |
| Hormonal therapy (HT) | 12 | 19.4 | 14 | 26.9 | 6 | 11.5 |  |  |
| CT+RT | 11 | 17.8 | 6 | 11.5 | 7 | 13.5 |  |  |
| CT+HT | 4 | 6.5 | 0 | 0 | 1 | 1.9 |  |  |
| RT+HT | 16 | 25.8 | 13 | 25.0 | 16 | 30.8 |  |  |
| CT+RT+HT | 13 | 20.9 | 10 | 19.2 | 14 | 26.9 |  |  |
| No treatment | 1 | 1.6 | 1 | 1.9 | 1 | 1.9 |  |  |

Abbreviations: ER= Estrogen Receptor; PgR= Progesterone Receptor; BRE= [Bloom-Richardson-Elston](https://www.google.com/search?sca_esv=08bd8e8cec846723&cs=0&q=Bloom-Richardson-Elston&sa=X&ved=2ahUKEwi28YfkpIWPAxW8MlkFHbHZKrUQxccNegQIAhAB&mstk=AUtExfBkezjlQmgMRfRPZv76vduytytQ2l1rxTbzQDfHleMZjnRnnJEfKf58swtGDyxuYmJHEHFFCPR-7BKvRB0xYtM9xlVH90S5OwgSBZjBIdFxgqvBy2qcwf0YOu3gbwBu0SI&csui=3)-skalan.

**Table 2** Depression and Anxiety

|  |  | **Group** | | |  |  |
| --- | --- | --- | --- | --- | --- | --- |
| **Measures HAD** | **Occasion** | **MBSR** | **Active controls** | **Non-MBSR** | ***p*-value4** | ***p*-value5  (effect size)** |
|  |  | **Median (IQR); n** | **Median  (IQR); n** | **Median (IQR); n** |  |  |
| **Depression** | Baseline | 4 (1-6); 62 | 2 (1-5); 52 | 2 (1-5); 52 | ref. | ref. |
| 3 months | 2 (1-5); 62 | 2 (1-4); 51 | 3 (1-5); 52 | 0.472 | **0.015; (dCohen=0.5)** |
| 6 months | 3 (1-6); 57 | 1.5 (1-3); 44 | 2 (1-5); 50 | 0.103 | 0.317 |
| 1 year | 2 (1-6); 56 | 2 (1-4); 43 | 3 (1-7); 49 | 0.050 | **0.013; (dCohen=0.5)** |
| 5 years | 4 (0-6); 42 | 2 (1-3); 34 | 2 (1-5); 40 | 0.882 | 0.843 |
| ***p*-value1** | **0.012** | **0.001** | 0.309 |  |  |
| ***p*-value2** | 0.056 | 0.303 | 0.093 |  |  |
| ***p*-value3** | 0.323 | 0.338 | 0.477 |  |  |
| **Anxiety** | Baseline | 6 (4-9); 62 | 4.5 (2-8); 52 | 4.5 (2-7); 52 | ref. | ref. |
| 3 months | 6 (3-8); 62 | 5 (2-9); 51 | 5 (2-8); 52 | 0.109 | 0.080 |
| 6 months | 5 (3-8); 57 | 4 (2-7.5); 44 | 4 (3-7); 50 | 0.191 | 0.264 |
| 1 year | 6 (2-10); 56 | 5 (2-9); 43 | 6 (3-8); 49 | 0.074 | **0.023; (dCohen=0.4)** |
| 5 years | 6.5 (3-9); 42 | 4 (2-7); 34 | 4 (3-6.5); 40 | 0.481 | 0.668 |
| ***p*-value1** | 0.278 | 0.127 | 0.682 |  |  |
| ***p*-value2** | 0.353 | 0.720 | **0.026** |  |  |
| ***p*-value3** | 0.630 | 0.433 | 0.950 |  |  |

Abbreviations: HAD=The Hospital Anxiety and Depression Scale; IQR=Inter Quartile Range; ref.=reference level.

1 Change within group between baseline and 6 months after intervention (Wilcoxon signed test)

2 Change within group between baseline and 1 year after intervention (Wilcoxon signed test)

3 Change within group between baseline and 5 years after intervention (Wilcoxon signed test)

4 Comparisons between the groups with respect to change between baseline and follow-up (comparison of Active controls vs. Non-MBSR by Mann-Whitney test)

5 Comparisons between the groups with respect to change between baseline and follow-up (comparison of MBSR vs. Non-MBSR by Mann-Whitney test)

dCohen=effect size (comp. Fritz, Morris & Richler, 2012, p. 12; Cohen, 2008)

**Table 3** Symptom experience

|  | **Group** | | | |  |  |
| --- | --- | --- | --- | --- | --- | --- |
| **Measures**  **MSAS** | **Occasion** | **MBSR** | **Active Controls** | **Non-MBSR** | ***p*-value4** | ***p*-value5 (effect size)** |
|  |  | **Median (IQR); n** | **Median (IQR); n** | **Median (IQR); n** |  |  |
| **Physical Symptoms** | Baseline | 0.61 (0.3-1.0); 62 | 0.50 (0.2-0.8); 52 | 0.46 (0.3-0.8); 52 | ref. | ref. |
| 3 months | 0.52 (0.2-0.9); 62 | 0.41 (0.2-0.7); 51 | 0.45 (0.1-0.7); 52 | 0.966 | 0.245 |
| 6 months | 0.56 (0.2-0.9); 57 | 0.38 (0.2-0.7); 45 | 0.39 (0.1-0.8); 50 | 0.973 | 0.322 |
| 1 year | 0.50 (0.2-1.0); 56 | 0.30 (0.1-0.6); 43 | 0.43 (0.2-0.9); 49 | 0.162 | 0.172 |
| 5 years | 0.55 (0.2-0.8); 42 | 0.31 (0.1-0.5); 34 | 0.41 (0.2-0.7); 40 | 0.927 | 0.978 |
| ***p*-value1** | **0.014** | 0.421 | 0.704 |  |  |
| ***p*-value2** | **0.032** | **0.045** | 0.924 |  |  |
| ***p*-value3** | 0.385 | 0.369 | 0.369 |  |  |
| **Psychological Symptoms** | Baseline | 1.34 (0.8-2.0); 62 | 0.79 (0.3-1.7); 52 | 0.76 (0.2-1.5); 52 | ref. | ref. |
| 3 months | 0.98 (0.4-1.9); 62 | 0.69 (0.3-1.5); 51 | 0.83 (0.3-1.4); 52 | 0.337 | **0.019; (dCohen=0.4)** |
| 6 months | 1.11(0.4-1.8); 57 | 0.66 (0.4-1.0); 45 | 0.71 (0.3-1.4); 50 | 0.281 | 0.488 |
| 1 year | 0.99 (0.2-1.8); 56 | 0.72 (0.3-1.3); 43 | 0.82 (0.2-1.6); 49 | 0.090 | **0.005; (dCohen=0.6)** |
| 5 years | 0.97(0.3-1.9); 42 | 0.54 (0.2-1.0); 34 | 0.51 (0.2-1.4); 40 | 0.200 | 0.745 |
| ***p*-value1** | 0.065 | 0.060 | 0.587 |  |  |
| ***p*-value2** | **0.002** | 0.170 | 0.281 |  |  |
| ***p*-value3** | 0.410 | 0.052 | 0.753 |  |  |
| **Global  Distress** | Baseline | 1.93 (1.6-2.3); 62 | 1.83 (1.3-2.3); 52 | 1.80 (1.4-2.2); 52 | ref. | ref. |
| 3 months | 1.80 (1.5-2.1); 62 | 1.60 (1.2-2.2); 51 | 2.0 (1.2-2.4); 52 | 0.015 | **0.013; (dCohen=0.5)** |
| 6 months | 1.93 (1.4-2.3); 57 | 1.84 (1.6-2.2); 45 | 1.7 (1.0-2.1); 50 | 0.519 | 0.319 |
| 1 year | 1.79 (1.3-2.3); 56 | 1.73 (1.3-2.0); 43 | 2.0 (1.5-2.4); 49 | 0.014 | **0.002; (dCohen=0.6)** |
| 5 years | 1.63 (1.2-2.3); 42 | 1.72 (1.2-2.0); 34 | 1.7 (1.1-2.0); 40 | 0.753 | 0.763 |
| ***p*-value1** | **0.034** | 0.669 | 0.566 |  |  |
| ***p*-value2** | **0.031** | 0.276 | **0.028** |  |  |
| ***p*-value3** | 0.150 | 0.721 | 0.383 |  |  |
| **Total  Symptom  Burden** | Baseline | 0.71 (0.4-1.0); 62 | 0.57 (0.3-1.0); 52 | 0.55 (0.3-0.9); 52 | ref. | ref. |
| 3 months | 0.56 (0.3-0.9); 62 | 0.49 (0.3-0.8); 51 | 0.56 (0.2-0.8); 52 | 0.671 | 0.097 |
| 6 months | 0.61 (0.3-1.0); 57 | 0.52 (0.3-0.7); 45 | 0.53 (0.2-0.9); 50 | 0.751 | 0.617 |
| 1 year | 0.55 (0.3-1.0); 56 | 0.39 (0.2-0.8): 43 | 0.49 (0.2-1.0); 49 | 0.221 | **0.046; (dCohen=0.4)** |
| 5 years | 0.57 (0.2-0.9); 42 | 0.33 (0.2-0.6); 34 | 0.52 (0.2-0.8); 40 | 0.888 | 0.831 |
| ***p*-value1** | **0.022** | 0.111 | 0.472 |  |  |
| ***p*-value2** | **0.003** | 0.057 | 0.811 |  |  |
| ***p*-value3** | 0.108 | 0.185 | 0.156 |  |  |

Abbreviations: MSAS=Memorial Symptom Assessment Scale; IQR=Inter Quartile Range; ref.=reference level.

1 Change within group between baseline and 6 months after intervention (Wilcoxon signed test)

2 Change within group between baseline and 1 year after intervention (Wilcoxon signed test)

3 Change within group between baseline and 5 years after intervention (Wilcoxon signed test)

4 Comparisons between the groups with respect to change between baseline and follow-up (comparison of Active controls vs. Non-MBSR by Mann-Whitney test)

5 Comparisons between the groups with respect to change between baseline and follow-up (comparison of MBSR vs. Non-MBSR by Mann-Whitney test)

dCohen=effect size (comp. Fritz, Morris & Richler, 2012, p. 12; Cohen, 2008)

**Table 4** Health status

|  |  | **Group** | | |  | |  | |
| --- | --- | --- | --- | --- | --- | --- | --- | --- |
| **Measures**  **SF-36** | **Occasion** | **MBSR** | **Active Controls** | **Non-MBSR** | | ***p*-value4**  **(effect size)** | | ***p*-value5 (effect size)** | |
|  |  | **Median (IQR); n** | **Median (IQR); n** | **Median (IQR); n** | |  | |  | |
| **Vitality** | Baseline | 52.5 (30-75); 62 | 60 (40-75); 52 | 55 (40-80); 52 | | ref. | | ref. | |
| 3 months | 65 (45-75); 62 | 65 (45-80); 51 | 60 (35-80); 51 | | 0.838 | | 0.159 | |
| 6 months | 65 (45-80); 57 | 65 (55-85); 45 | 65 (55-80); 50 | | 0.520 | | 0.213 | |
| 1 year | 60 (40-85); 56 | 70 (50-85); 42 | 60 (40-75); 49 | | 0.030 | | **0.007; (dCohen=0.5)** | |
| 5 years | 65 (45-80); 42 | 67.5(55-80); 34 | 60 (45-80); 40 | | 0.617 | | 0.494 | |
| ***p*-value1** | **<0.001** | **0.017** | 0.169 | |  | |  | |
| ***p*-value2** | **<0.001** | **0.011** | 0.620 | |  | |  | |
| ***p*-value3** | 0.068 | 0.186 | 0.463 | |  | |  | |
| **Physical functioning** | Baseline | 80 (70-90); 61 | 90 (75-95); 52 | 80 (70-95); 52 | | ref. | | ref. | |
| 3 months | 90 (75-95); 61 | 95 (80-95); 51 | 90 (72.5-95); 52 | | 0.129 | | 0.822 | |
| 6 months | 90 (75-95); 57 | 90 (80-100); 45 | 90 (70-95); 50 | | 0.202 | | 0.732 | |
| 1 year | 90 (77.5-95); 56 | 90 (85-100); 43 | 90 (80-100); 49 | | 0.572 | | 0.482 | |
| 5 years | 85 (70-95); 42 | 92.5 (70-100); 34 | 85 (70-95); 40 | | 0.608 | | 0.716 | |
| ***p*-value1** | **<0.001** | 0.521 | **0.015** | |  | |  | |
| ***p*-value2** | **<0.001** | 0.176 | **0.021** | |  | |  | |
| ***p*-value3** | 0.535 | 0.525 | 0.921 | |  | |  | |
| **Bodily pain** | Baseline | 67 (45-90); 62 | 77.5 (55-90); 52 | 67 (56-90); 52 | | ref. | | ref. | |
| 3 months | 77.5 (45-90); 62 | 79.6 (57-100); 51 | 85 (56-100); 52 | | 0.526 | | 0.799 | |
| 6 months | 67.3 (57-90); 57 | 67 (57-90); 45 | 90 (57-100); 50 | | 0.113 | | 0.875 | |
| 1 year | 69.4 (45-90); 56 | 77.5 (57-100); 43 | 69.4 (45-100); 49 | | 0.595 | | 0.226 | |
| 5 years | 73.5 (45-90); 42 | 77.5 (45-100); 34 | 77.5 (57-100); 40 | | 0.870 | | 0.762 | |
| ***p*-value1** | 0.141 | 0.465 | 0.152 | |  | |  | |
| ***p*-value2** | 0.087 | 0.882 | 0.790 | |  | |  | |
| ***p*-value3** | 0.694 | 0.724 | 0.955 | |  | |  | |
| **General health perceptions** | Baseline | 60 (45-75); 61 | 72.5 (52-80); 52 | 70 (60-85); 52 | | ref. | | ref. | |
| 3 months | 70 (55-85); 61 | 70 (60-85); 51 | 75 (55-80); 52 | | 0.465 | | 0.087 | |
| 6 months | 65 (55-80); 57 | 75 (55-80); 44 | 80 (60-85); 50 | | 0.766 | | 0.727 | |
| 1 year | 65 (52-85); 56 | 75 (55-85); 42 | 65 (45-85); 49 | | 0.056 | | **0.031; (dCohen=0.4)** | |
| 5 years | 62.5(45-85); 42 | 70 (50-85); 34 | 70 (50-85); 40 | | 0.603 | | 0.568 | |
| ***p*-value1** | 0.275 | 0.265 | 0.436 | |  | |  | |
| ***p*-value2** | **0.029** | **0.048** | 0.345 | |  | |  | |
| ***p*-value3** | 0.966 | 0.951 | 0.519 | |  | |  | |
| **Physical role functioning** | Baseline | 50 (0-100); 61 | 25 (0-88); 52 | 25 (0-75); 52 | | ref. | | ref. | |
| 3 months | 75 (25-100); 61 | 75 (50-100); 51 | 75 (12-100); 52 | | 0.463 | | 0.768 | |
| 6 months | 100 (25-100); 56 | 100 (75-100); 45 | 100 (50-100); 50 | | 0.857 | | 0.157 | |
| 1 year | 75 (37-100); 56 | 100 (50-100); 43 | 100 (25-100); 49 | | 0.454 | | 0.760 | |
| 5 years | 100 (0-100); 42 | 100 (50-100); 34 | 100 (37-100); 40 | | 0.794 | | 0.330 | |
| ***p*-value1** | **0.002** | **<0.001** | **<0.001** | |  | |  | |
| ***p*-value2** | **<0.001** | **<0.001** | **<0.001** | |  | |  | |
| ***p*-value3** | 0.059 | **0.005** | **<0.001** | |  | |  | |
| **Emotional role functioning** | Baseline | 66.7 (33-100); 61 | 100 (33-100); 52 | 100 (0-100); 52 | | ref. | | ref. | |
| 3 months | 100 (33-100); 61 | 100 (67-100); 51 | 100 (33-100); 52 | | 0.652 | | 0.900 | |
| 6 months | 100 (67-100); 57 | 100 (100-100); 45 | 100 (67-100); 50 | | 0.372 | | 0.820 | |
| 1 year | 100 (33-100); 56 | 100 (100-100); 43 | 100 (33-100); 49 | | 0.704 | | 0.780 | |
| 5 years | 100 (33-100); 42 | 100 (67-100); 34 | 100 (67-100); 40 | | 0.875 | | 0.235 | |
| ***p*-value1** | **0.004** | **0.038** | **0.003** | |  | |  | |
| ***p*-value2** | **0.048** | **0.076** | 0.091 | |  | |  | |
| ***p*-value3** | 0.980 | 0.070 | **0.026** | |  | |  | |
| **Social functioning** | Baseline | 75 (62.5-100); 62 | 87.5 (56-100); 52 | 75 (50-100); 52 | | ref. | | ref. | |
| 3 months | 87.5 (62.5-100); 62 | 100 (62-100); 51 | 100 (75-100); 52 | | 0.105 | | 0.117 | |
| 6 months | 100 (75-100); 57 | 87.5 (75-100); 45 | 100 (75-100); 50 | | 0.663 | | 0.503 | |
| 1 year | 100 (69-100); 56 | 100 (75-100); 43 | 100 (62-100); 49 | | 0.788 | | 0.753 | |
| 5 years | 81 (50-100); 42 | 100 (75-100); 34 | 100 (75-100); 40 | | 0.203 | | 0.162 | |
| ***p*-value1** | **<0.001** | **0.032** | **0.031** | |  | |  | |
| ***p*-value2** | **0.007** | **0.008** | 0.097 | |  | |  | |
| ***p*-value3** | 0.575 | 0.213 | **0.005** | |  | |  | |
| **Mental health** | Baseline | 72 (56-80); 62 | 80 (60-92); 52 | 84 (64-88); 52 | | ref. | | ref. | |
| 3 months | 76 (64-84); 62 | 80 (64-92); 51 | 84 (60-92); 51 | | 0.038; (**dCohen =0.4)** | | **<0.001; (dCohen=0.7)** | |
| 6 months | 80 (68-88); 57 | 84 (72-92); 45 | 76 (64-92); 50 | | 0.136 | | **0.008; (dCohen=0.5)** | |
| 1 year | 80 (64-92); 56 | 84 (64-92); 43 | 76 (60-88); 49 | | 0.085 | | **<0.001; (dCohen=0.8)** | |
| 5 years | 78 (64-88); 42 | 84 (68-92); 34 | 80 (68-92); 40 | | 0.449 | | 0.091 | |
| ***p*-value1** | **<0.001** | 0.084 | 0.735 | |  | |  | |
| ***p*-value2** | **<0.001** | 0.313 | 0.093 | |  | |  | |
| ***p*-value3** | **0.038** | 0.543 | 0.706 | |  | |  | |

Abbreviations: SF-36=36-Item Short Form Survey; IQR=Inter Quartile Range; ref.=reference level.

1 Change within group between baseline and 6 months after intervention (Wilcoxon signed test)

2 Change within group between baseline and 1 year after intervention (Wilcoxon signed test)

3 Change within group between baseline and 5 years after intervention (Wilcoxon signed test)

4 Comparisons between the groups with respect to change between baseline and follow-up (comparison of Active controls vs. Non-MBSR by Mann-Whitney test)

5 Comparisons between the groups with respect to change between baseline and follow-up (comparison of MBSR vs. Non-MBSR by Mann-Whitney test)

**Table 5** Coping Capacity

|  |  | **Group** | | |  |  |
| --- | --- | --- | --- | --- | --- | --- |
| **Measures**  **SOC** | **Occasion** | **MBSR** | **Active controls** | **Non-MBSR** | ***p*-value4** | ***p*-value5 (effect size)** |
|  |  | **Median (IQR); n** | **Median (IQR); n** | **Median (IQR); n** |  |  |
| **Coping Capacity** | baseline | 67 (55-76); 62 | 71 (59-80); 52 | 72 (65.5-81); 52 | ref. | ref. |
| 3 months | 66.5 (60-77); 62 | 75 (61-81); 51 | 69 (61.5-79); 52 | 0.098 | **0.028; (dCohen=0.4)** |
| 6 months | 66 (55-78); 57 | 72.5 (63-82); 44 | 71 (61-78); 50 | 0.024 | **0.044; (dCohen=0.4)** |
| 1 year | 69 (57-79.5); 56 | 73 (61-81); 43 | 70 (57-79); 49 | 0.059 | **0.006; (dCohen=0.6)** |
| 5 years | 72 (59-82); 42 | 76 (64-82); 34 | 73.5 (68-80); 40 | 0.331 | 0.318 |
| ***p*-value1** | 0.313 | 0.131 | 0.055 |  |  |
| ***p*-value2** | 0.103 | 0.487 | **0.031** |  |  |
| ***p*-value3** | 0.081 | 0.158 | 0.734 |  |  |

Abbreviations: SOC=Sense of Coherence scale; IQR=Inter Quartile Range; ref.=reference level.

1 Change within group between baseline and 6 months after intervention (Wilcoxon signed test)

2 Change within group between baseline and 1 year after intervention (Wilcoxon signed test)

3 Change within group between baseline and 5 years after intervention (Wilcoxon signed test)

4 Comparisons between the groups with respect to change between baseline and follow-up (comparison of Active controls vs. Non-MBSR by Mann-Whitney test)

5 Comparisons between the groups with respect to change between baseline and follow-up (comparison of MBSR vs. Non-MBSR by Mann-Whitney test)

dCohen=effect size (comp. Fritz, Morris & Richler, 2012, p. 12; Cohen, 2008)

**Table 6** Biomarkers

|  |  | **Group** | | |  |  |
| --- | --- | --- | --- | --- | --- | --- |
| **Measures** | **Occasion** | **MBSR** | **Active controls** | **Non-MBSR** | ***p*-value4**  **(effect size)** | ***p*-value5**  **(effect size)** |
|  |  | **Median (IQR); n** | **Median (IQR); n** | **Median (IQR); n** |  |  |
| **NK-cells activity** | Baseline | 18 (14-25) 62 | 20 (14-27) 51 | 19 (13-24) 50 | ref. | ref. |
| 3 months | 22 (17-27) 62 | 19 (16-23) 50 | 20 (15-25) 50 | 0.602 | 0.142 |
| 6 months | 21 (17-26) 57 | 21 (17-26.5) 44 | 19 (16-23) 50 | 0.375 | 0.261 |
| 1 year | 21 (15-27) 55 | 22 (16-28) 43 | 20 (13.5-26) 48 | 0.643 | 0.798 |
| 5 years | 24 (20-33) 41 | 28 (24-31) 34 | 27 (18-31) 39 | 0.536 | 0.900 |
| ***p*-value1** | 0.080 | 0.179 | 0.823 |  |  |
| ***p*-value2** | 0.205 | 0.108 | 0.337 |  |  |
| ***p*-value3** | **0.003** | **0.001** | **0.003** |  |  |
| **Lymphocytes x10e9/l** | Baseline | 1.3 (1-1.7) 62 | 1.4 (1.2-1.9) 52 | 1.3 (1-1.7) 52 | ref. | ref. |
| 3 months | 1.4 (1-1.7) 62 | 1.4 (1.1-1.7) 51 | 1.2 (1-1.8) 52 | 0.280 | 0.559 |
| 6 months | 1.3 (1-1.8) 57 | 1.6 (1.2-1.9) 44 | 1.4 (1-1.8) 50 | 0.279 | 0.373 |
| 1 year | 1.7 (1.2-2.2) 54 | 1.5 (1.2-1.9) 43 | 1.5 (1.2-2.1) 49 | 0.508 | 0.463 |
| 5 years | 1.7 (1.2-2) 42 | 1.9 (1.4-2.2) 34 | 1.6 (1.3-2.0) 39 | 0.403 | 0.910 |
| ***p*-value1** | 0.670 | **0.003** | 0.167 |  |  |
| ***p*-value2** | **0.008** | **0.008** | **<0.001** |  |  |
| ***p*-value3** | **0.004** | **<0.001** | **0.012** |  |  |
| **CD3 T%** | Baseline | 74 (67-82) 62 | 71.5 (68-78.5) 52 | 78 (71.5-81.5) 52 | ref. | ref. |
| 3 months | 72 (68-80) 62 | 71 (68-77) 51 | 75 (67.5-79) 52 | 0.061 | 0.222 |
| 6 months | 68 (63-75) 57 | 69.5 (66-75.5) 44 | 71.5 (65-78) 50 | 0.060 | 0.933 |
| 1 year | 70 (61-77) 54 | 69 (65-78); 43 | 71 (63-78) 49 | **0.040; (dCohen=0.4)** | 0.441 |
| 5 years | 69.5 (64-80) 42 | 68.5 (64-77) 34 | 70 (64-77) 39 | 0.170 | 0.487 |
| ***p*-value1** | **<0.001** | **0.009** | **<0.001** |  |  |
| ***p*-value2** | **<0.001** | **0.005** | **<0.001** |  |  |
| ***p*-value3** | **0.017** | 0.057 | **<0.001** |  |  |
| **CD3 T x 10e9/l** | Baseline | 1.0 (0.7-1.3) 62 | 1.1 (0.9-1.4) 52 | 1.0 (0.8-1.3) 52 | ref. | ref. |
| 3 months | 1.0 (0.6-1.3) 62 | 1.0 (0.7-1.2) 51 | 0.8 (0.7-1.3) 52 | 0.424 | 0.800 |
| 6 months | 0.9 (0.7-1.3) 57 | 1.1 (0.9-1.3) 44 | 0.9 (0.7-1.3) 50 | 0.155 | 0.580 |
| 1 year | 1.0 (0.8-1.5) 54 | 1.0 (0.8-1.4) 43 | 1.0 (0.8-1.5) 49 | 0.486 | 0.496 |
| 5 years | 1.1 (0.7-1.4) 42 | 1.3 (1-1.6) 34 | 1.2 (0.9-1.4) 39 | 0.295 | 0.977 |
| ***p*-value1** | 0.366 | **0.039** | 0.849 |  |  |
| ***p*-value2** | 0.109 | 0.088 | **0.020** |  |  |
| ***p*-value3** | 0.023 | **0.001** | **0.037** |  |  |
| **CD3+4+Th%** | Baseline | 42 (37-48) 62 | 46 (39.5-50.5) 52 | 46 (38.5-54.5) 52 | ref. | ref. |
| 3 months | 40.5 (35-47) 62 | 45 (41-50) 51 | 43.5 (39-50) 52 | 0.080 | 0.253 |
| 6 months | 41 (35-46) 57 | 45 (38-49) 44 | 42 (36-48) 50 | 0.051 | 0.124 |
| 1 year | 39 (33-45) 54 | 44 (39-49) 43 | 43 (37-50) 49 | **0.035; (dCohen=0.4)** | 0.465 |
| 5 years | 40.5 (35-46) 42 | 45 (39-50) 34 | 43 (36-49) 39 | 0.198 | 0.237 |
| ***p*-value1** | 0.064 | 0.137 | **<0.001** |  |  |
| ***p*-value2** | **0.008** | 0.156 | **<0.001** |  |  |
| ***p*-value3** | 0.674 | 0.639 | **0.046** |  |  |
| **CD3+4+x**  **10e9/l** | Baseline | 0.5 (0.4-0.7) 62 | 0.7 (0.5-0.8) 52 | 0.6 (0.5-0.7) 52 | ref. | ref. |
| 3 months | 0.5 (0.4-0.7) 62 | 0.6 (0.4-0.8) 51 | 0.6 (0.4-0.7) 52 | 0.864 | 0.860 |
| 6 months | 0.5 (0.4-0.7) 57 | 0.7 (0.5-0.9) 44 | 0.5 (0.4-0.7) 50 | **0.025; (dCohen=0.5)** | 0.771 |
| 1 year | 0.6 (0.4-0.9) 54 | 0.7 (0.5-0.9) 43 | 0.6 (0.5-0.8) 49 | 0.469 | 0.340 |
| 5 years | 0.6 (0.5-0.8) 42 | 0.8 (0.7-0.9) 34 | 0.6 (0.5-0.8) 39 | 0.228 | 0.895 |
| ***p*-value1** | 0.932 | **0.009** | 0.683 |  |  |
| ***p*-value2** | 0.076 | **0.021** | **0.007** |  |  |
| ***p*-value3** | **0.001** | **<0.001** | **0.012** |  |  |
| **CD3+8+T cy/s%** | Baseline | 28 (20-37) 62 | 26 (21-35) 52 | 25 (21-38) 52 | ref. | ref. |
| 3 months | 25.5 (20-38) 62 | 25 (20-34) 51 | 24.5 (19-36) 52 | 0.819 | 0.999 |
| 6 months | 26 (20-35) 57 | 25 (21-33) 44 | 24.5 (19-35) 50 | 0.951 | 0.442 |
| 1 year | 25 (19-36) 54 | 24 (18-34) 43 | 25 (18-31) 49 | 0.714 | 0.887 |
| 5 years | 26 (17-34) 42 | 25 (19-30) 34 | 24 (19-33) 39 | 0.782 | 0.773 |
| ***p*-value1** | **<0.001** | **0.013** | **0.044** |  |  |
| ***p*-value2** | **0.002** | **<0.001** | **0.003** |  |  |
| ***p*-value3** | **0.006** | 0.069 | 0.061 |  |  |
| **CD3+8+x**  **10e9/l** | Baseline | 0.4 (0.2-0.6) 62 | 0.4 (0.3-0.6) 52 | 0.3 (0.2-0.5) 52 | ref. | ref. |
| 3 months | 0.3 (0.2-0.6) 62 | 0.3 (0.2-0.5) 51 | 0.3 (0.2-0.5) 52 | 0.384 | 0.750 |
| 6 months | 0.3 (0.2-0.5) 57 | 0.4 (0.3-0.5) 44 | 0.3 (0.2-0.5) 50 | 0.583 | 0.141 |
| 1 year | 0.4 (0.3-0.6) 54 | 0.4 (0.2-0.6) 43 | 0.4 (0.3-0.6) 49 | 0.333 | 0.372 |
| 5 years | 0.4 (0.3-0.7) 42 | 0.5 (0.3-0.6) 34 | 0.4 (0.3-0.6) 39 | 0.271 | 0.835 |
| ***p*-value1** | 0.172 | 0.109 | 0.440 |  |  |
| ***p*-value2** | 0.403 | 0.444 | **0.024** |  |  |
| ***p*-value3** | 0.223 | **0.005** | 0.161 |  |  |
| **CD3-16+56+NK%** | Baseline | 14.5 (11-21) 62 | 15 (12-19.5) 52 | 13.5 (10-19) 52 | ref. | ref. |
| 3 months | 15 (10-21) 62 | 15 (11-19) 51 | 13.5 (10-18) 52 | **0.025; (dCohen=0.5)** | 0.077 |
| 6 months | 15 (12-20) 57 | 15 (12.5-20) 44 | 14.5 (12-21) 50 | 0.378 | 0.274 |
| 1 year | 16 (10-22) 54 | 15 (12-20) 43 | 15 (10-22) 49 | 0.185 | 0.122 |
| 5 years | 16 (10-21) 42 | 16.5 (12-20) 34 | 15 (12-22) 39 | 0.617 | 0.220 |
| ***p*-value1** | 0.926 | 0.747 | 0.096 |  |  |
| ***p*-value2** | 0.527 | 0.654 | 0.150 |  |  |
| ***p*-value3** | 0.561 | 0.803 | 0.272 |  |  |
| **CD3-16+56+NKx**  **10e9/l** | Baseline | 0.21 (0.13-0.29) 62 | 0.24 (0.15-0.30) 52 | 0.18 (0.11-0.29) 52 | ref. | ref. |
| 3 months | 0.22 (0.13-0.29) 62 | 0.19 (0.13-0.26) 51 | 0.19 (0.13-0.30) 52 | **0.011; (dCohen=0.5)** | **0.041; (dCohen=0.4)** |
| 6 months | 0.21 (0.14-0.27) 57 | 0.24 (0.18-0.33) 44 | 0.20 (0.13-0.31) 50 | 0.964 | 0.126 |
| 1 year | 0.25 (0.19-0.35) 54 | 0.22 (0.17-0.32) 43 | 0.27 (0.15-0.37) 49 | 0.114 | 0.152 |
| 5 years | 0.24 (0.15-0.36) 42 | 0.27 (0.21-0.38) 34 | 0.26 (0.17-0.33) 39 | 0.795 | 0.646 |
| ***p*-value1** | 0.785 | **0.013** | **0.014** |  |  |
| ***p*-value2** | 0.174 | 0.129 | **<0.001** |  |  |
| ***p*-value3** | **0.007** | **<0.001** | **0.011** |  |  |
| **CD19 B%** | Baseline | 7.5 (4-13) 62 | 10 (7-12.5) 52 | 8 (3.11) 52 | ref. | ref. |
| 3 months | 10 (7-14) 62 | 12 (9-15) 51 | 9 (6-12) 52 | 0.417 | 0.957 |
| 6 months | 12 (8-17) 57 | 11 (8-15) 44 | 10 (8-15) 50 | 0.145 | 0.871 |
| 1 year | 11.5 (9-17) 54 | 12 (9-16) 43 | 11 (8-16) 49 | 0.112 | 0.608 |
| 5 years | 10 (9-16) 42 | 13 (10-16) 34 | 12 (8-17) 39 | 0.115 | 0.599 |
| ***p*-value1** | **<0.001** | **0.003** | **<0.001** |  |  |
| ***p*-value2** | **<0.001** | **<0.001** | **<0.001** |  |  |
| ***p*-value3** | **0.002** | 0.064 | **<0.001** |  |  |
| **CD19B x 10e9/l** | Baseline | 0.09 (0.04-0.21) 62 | 0.14 (0.08-0.23) 52 | 0.10 (0.04-0.16) 52 | ref. | ref. |
| 3 months | 0.12 (0.08-0.21) 62 | 0.17 (0.11-0.22) 51 | 0.13 (0.09-0.17) 52 | 0.362 | 0.862 |
| 6 months | 0.15 (0.10-0.24) 57 | 0.19 (0.13-0.25) 44 | 0.16 (0.10-0.22) 50 | 0.940 | 0.995 |
| 1 year | 0.18 (0.12-0.27) 54 | 0.17 (0.13-0.30) 43 | 0.20 (0.12-0.29) 49 | 0.050 | 0.327 |
| 5 years | 0.18 (0.12-0.22) 42 | 0.21 (0.18-0.31) 34 | 0.20 (0.13-0.29) 39 | 0.987 | 0.809 |
| ***p*-value1** | **<0.001** | **<0.001** | **<0.001** |  |  |
| ***p*-value2** | **<0.001** | **<0.001** | **<0.001** |  |  |
| ***p*-value3** | **<0.001** | **<0.001** | **<0.001** |  |  |
| **CD3+4+/CD3+8+quotient%** | Baseline | 1.6 (1-2.1) 62 | 1.8 (1.3-2.3) 52 | 1.7 (1.1-2.7) 52 | ref | Ref |
| 3 months | 1.7 (1.0-2.2) 62 | 1.8 (1.2-2.3) 51 | 1.8 (1.1-2.5) 52 | 0.336 | 0.313 |
| 6 months | 1.6 (1.1-2.2) 57 | 1.8 (1.2-2.2) 44 | 1.7 (1.1-2.4) 50 | 0.257 | 0.206 |
| 1 year | 1.6 (1.1-2.3) 54 | 1.7 (1.3-2.5) 43 | 1.7 (1.3-2.5) 49 | 0.095 | 0.428 |
| 5 years | 1.5 (1.2-2.3) 42 | 1.7 (1.4-2.4) 34 | 1.8 (1.2-2.6) 39 | 0.864 | 0.780 |
| ***p*-value1** | 0.253 | 0.177 | 0.441 |  |  |
| ***p*-value2** | 0.326 | **0.023** | 0.897 |  |  |
| ***p*-value3** | 0.051 | 0.237 | 0.234 |  |  |
| **IL-6 a** | baseline | 1.0 (0.7-2.3); 62 | 1.1 (0.7-1.7); 50 | 1.1 (0.5-2.4); 50 | ref. | ref. |
| 3 months | 1.1 (0.7-1.9); 61 | 1.0 (0.7-2.0); 50 | 1.2 (0.5-1.8); 50 | 0.665 | 0.528 |
| 6 months | 1.2 (0.9-1.7); 57 | 1.2 (0.9-1.9); 44 | 1.6 (1.0-2.5); 48 | 0.328 | **0.049(dCohen=0.4)** |
| 1 year | 1.1 (0.9-1.6); 56 | 1.3 (1-1.7); 41 | 1.1 (0.7-1.8); 49 | 0.724 | 0.893 |
| 5 years | 2.1 (1.6-2.8); 42 | 2.0 (1.5-2.4); 34 | 2.1 (1.5-3.4); 39 | 0.972 | 0.721 |
| ***p*-value1** | 0.774 | 0.413 | **0.037** |  |  |
| ***p*-value2** | 0.820 | 0.559 | 0.815 |  |  |
| ***p*-value3** | **<0.001** | **<0.001** | **0.006** |  |  |
| **IL-8 a** | baseline | 12.0 (9.3-15); 61 | 12 (9-14); 50 | 12 (9.1-15); 49 | ref. | ref. |
| 3 months | 12.0 (9.7-15.0); 61 | 11 (9.4-15); 50 | 12 (9.3-16); 50 | 0.803 | 0.595 |
| 6 months | 12.2 (10.3-15.1); 57 | 12 (9.5-15.7); 44 | 10.7 (9.5-14); 48 | 0.152 | 0.156 |
| 1 year | 13.0 (10.4-16.2) | 12.3 (10.3-16.9); 42 | 11.2 (9.8-14.6);49 | 0.444 | **0.039 (dCohen=0.4)** |
| 5 years | 14.3 (12.6-18.2); 42 | 13.9 (11.5-19.5); 34 | 13.4 (10.7-15.2);39 | 0.219 | 0.561 |
| ***p*-value1** | 0.259 | 0.241 | 0.318 |  |  |
| ***p*-value2** | **0.018** | 0.416 | 0.530 |  |  |
| ***p*-value3** | **0.009** | **<0.001** | **0.037** |  |  |

Abbreviations: IQR=Inter Quartile Range; ref.=reference level.

1 Change within group between baseline and 6 months after intervention (Wilcoxon signed test)

2 Change within group between baseline and 1 year after intervention (Wilcoxon signed test)

3 Change within group between baseline and 5 years after intervention (Wilcoxon signed test)

4 Comparisons between the groups with respect to change between baseline and follow-up (comparison of Active controls vs. Non-MBSR by Mann-Whitney test)

5 Comparisons between the groups with respect to change between baseline and follow-up (comparison of MBSR vs. Non-MBSR by Mann-Whitney test)

a pg/mL, method Immulite was used for all measurements after 3 months and some of the measurements at baseline and 3 months were analyzed by ELISA instead of Immulite.
